# Supplementary material for: Genome Characterization of Bacteriophage KPP-1, a Novel Member in the Subfamily Vequintavirinae, and Use of Its Endolysin for the Lysis of Multidrug-Resistant Klebsiella variicola In Vitro
Source: MDPI journal article supplement (doi:10.3390/microorganisms11010207), 2023-01-13
Supplement: s1 [file s1]

Supplementary Table S1. Host range analysis of Klebsiella phage KPP-1

| Lab Ref.<br>No | Bacterium                                    | Medium       | Growth<br>Temp. °C | Lytic ability | Origin                                   |
|----------------|----------------------------------------------|--------------|--------------------|---------------|------------------------------------------|
| 200            | <i>Klebsiella variicola</i>                  | NB           | 37                 | ++++          | Propagation host<br>(Laboratory isolate) |
| 229            | <i>Klebsiella variicola</i>                  | NB           | 37                 | ++++          | Laboratory isolate                       |
| 228            | <i>Klebsiella pneumoniae</i>                 | NB           | 37                 | -             | „                                        |
| 231            | <i>Klebsiella pneumoniae</i>                 | NB           | 37                 | -             | „                                        |
| 170            | <i>Aeromonas hydrophila</i>                  | TSB          | 25                 | -             | „                                        |
| 120            | <i>Aeromonas salmonicida</i>                 | TSB          | 25                 | -             | „                                        |
| 226            | <i>Aeromonas sobria</i>                      | TSB          | 25                 | -             | „                                        |
| 192            | <i>Aeromonas veronii</i>                     | TSB          | 25                 | -             | „                                        |
| 194            | <i>Aeromonas veronii</i>                     | TSB          | 25                 | -             | „                                        |
| 97             | <i>Cronobacter sakazakii</i><br>ATCC29544    | LB           | 37                 | -             | ATCC                                     |
| 203            | <i>Edwardsiella piscicida</i>                | BHI          | 25                 | -             | Laboratory isolate                       |
| 204            | <i>Edwardsiella piscicida</i>                | BHI          | 25                 | -             | Laboratory isolate                       |
| 175            | <i>Enterobacter cloacae</i>                  | LB           | 37                 | -             | Laboratory isolate                       |
| 25             | <i>Enterococcus faecalis</i>                 | LB           | 37                 | -             | Laboratory isolate                       |
| 96             | <i>Escherichia coli</i> O157:H7<br>ATCC35150 | LB           | 37                 | -             | ATCC                                     |
| 225            | <i>Morganella morganii</i>                   | NB           | 37                 | -             | Laboratory isolate                       |
| 182            | <i>Pantoea dispersa</i>                      | NB           | 37                 | -             | „                                        |
| 324            | <i>Providencia rettgeri</i>                  | TSB          | 37                 | -             | „                                        |
| 14             | <i>Shigella flexneri</i>                     | LB           | 37                 | -             | „                                        |
| 38             | <i>Shigella flexneri</i>                     | LB           | 37                 | -             | „                                        |
| 146            | <i>Staphylococcus aureus</i>                 | TSB          | 37                 | -             | „                                        |
| 326            | <i>Staphylococcus haemolyticus</i>           | TSB          | 37                 | -             | „                                        |
| 59             | <i>Listeria monocytogenes</i>                | TSB          | 37                 | -             | „                                        |
| 206            | <i>Vibrio tubiashi</i>                       | BHI+ 1% NaCl | 25                 | -             | „                                        |
| 207            | <i>Vibrio tubiashi</i>                       | BHI +1% NaCl | 25                 | -             | „                                        |
| 209            | <i>Vibrio crassostrea</i>                    | BHI +1% NaCl | 25                 | -             | „                                        |
| 210            | <i>Vibrio crassostrea</i>                    | BHI +1% NaCl | 25                 | -             | „                                        |
| 212            | <i>Vibrio splendidus</i>                     | BHI +1% NaCl | 25                 | -             | „                                        |
| 213            | <i>Vibrio splendidus</i>                     | BHI +1% NaCl | 25                 | -             | „                                        |
| 214            | <i>Vibrio ichthyonteri</i>                   | BHI +1% NaCl | 25                 | -             | „                                        |
| 215            | <i>Vibrio ichthyonteri</i>                   | BHI +1% NaCl | 25                 | -             | „                                        |
| 220            | <i>Vibrio cyclitrophicus</i>                 | BHI +1% NaCl | 25                 | -             | „                                        |
