# Supplementary material for: Genome Characterization of Bacteriophage KPP-1, a Novel Member in the Subfamily Vequintavirinae, and Use of Its Endolysin for the Lysis of Multidrug-Resistant Klebsiella variicola In Vitro
Source: MDPI journal article supplement (doi:10.3390/microorganisms11010207), 2023-01-13
Supplement: s1 [file s1]

Supplementary Table S2. Functional grouping of ORFs in the genome of *Klebsiella* phage KPP-

1

| Functional group                        | Putative function                                                           | Locus tag | Homologous organism             | Percent sequence identity (%) |
|-----------------------------------------|-----------------------------------------------------------------------------|-----------|---------------------------------|-------------------------------|
| Structural                              | Putative tail fiber protein                                                 | KPP_1411  | Klebsiella phage vB_KpnM_KB57   | 100                           |
|                                         | Putative membrane protein                                                   | KPP_1441  | Klebsiella phage vB_KpnM_KB57   | 100                           |
|                                         | Putative tail fiber protein                                                 | KPP_1461  | Proteus phage Mydo              | 100                           |
|                                         | Tail length tape-measure protein                                            | KPP_1591  | Klebsiella phage vB_KpnM_KB57   | 96.63                         |
|                                         | Structural protein                                                          | KPP_1631  | Klebsiella phage vB_KpnM_KB57   | 99.8                          |
| Nucleotide metabolism and transcription | Nicotinamide phosphoribosyltransferase (EC 2.4.2.12)                        | KPP_11111 | Proteus phage Mydo              | 100                           |
|                                         | Ribose-phosphate pyrophosphokinase (EC 2.7.6.1)                             | KPP_11121 | Klebsiella phage vB_KpnM_BIS47  | 99.62                         |
|                                         | NAD-dependent protein deacetylase of SIR2 family                            | KPP_11251 | Klebsiella phage vB_KpnM_KB57   | 100                           |
|                                         | Uncharacterized domain COG3236 / GTP cyclohydrolase II (EC 3.5.4.25)        | KPP_11371 | Proteus phage Mydo              | 90                            |
|                                         | Putative exodeoxyribonuclease                                               | KPP_11391 | Klebsiella phage vB_KpnM_KB57   | 97.73                         |
|                                         | Phage endonuclease                                                          | KPP_11421 | Klebsiella phage vB_KpnM_KB57   | 100                           |
|                                         | Putative thymidylate synthase                                               | KPP_11501 | Klebsiella phage KNP2           | 99.4                          |
|                                         | Ribonucleotide reductase of class Ia (aerobic), alpha subunit (EC 1.17.4.1) | KPP_11531 | Klebsiella phage vB_KpnM_VIK251 | 99.74                         |
|                                         | Ribonucleotide reductase of class Ia (aerobic), beta subunit (EC 1.17.4.1)  | KPP_11541 | Klebsiella phage vB_KpnM_KB57   | 100                           |
|                                         | PhoH-like protein                                                           | KPP_11601 | Klebsiella phage vB_KpnM_KB57   | 100                           |
|                                         | Prophage Clp protease-like protein                                          | KPP_11641 | Klebsiella phage vB_KpnM_KB57   | 99.67                         |
|                                         | Putative DNA methyltransferase                                              | KPP_11651 | Raoultella phage Ro1            | 100                           |
|                                         | CCA tRNA nucleotidyltransferase (EC 2.7.7.72)                               | KPP_11711 | Klebsiella phage vB_KpnM_BIS47  | 99.52                         |
|                                         | Phage-associated homing endonuclease                                        | KPP_12431 | Mydovirus KpS8                  | 100                           |
|                                         | Putative metal dependent phosphohydrolase                                   | KPP_12491 | Klebsiella phage vB_KpnM_KB57   | 100                           |
|                                         | ATPase                                                                      | KPP_12541 | Klebsiella phage vB_KpnM_BIS47  | 100                           |
| DNA replication                         | DNA helicase, phage-associated                                              | KPP_121   | Mydovirus KpS8                  | 100                           |
|                                         | Phage DNA primase/helicase                                                  | KPP_1111  | Klebsiella phage vB_KpnM_BIS47  | 100                           |
|                                         | Phage DNA-directed DNA polymerase (EC 2.7.7.7)                              | KPP_1131  | Klebsiella phage vB_KpnM_BIS47  | 99.66                         |
|                                         | RNA ligase                                                                  | KPP_11211 | Klebsiella phage vB_KpnM_BIS47  | 100                           |
|                                         | DNA ligase                                                                  | KPP_11261 | Klebsiella phage KNP2           | 99.54                         |
|                                         | RNA ligase 2                                                                | KPP_12671 | Klebsiella phage vB_KpnM_KB57   | 100                           |

|           |                            |           |                               |     |
|-----------|----------------------------|-----------|-------------------------------|-----|
| Packaging | Terminase large subunit    | KPP_1761  | Klebsiella phage vB_KpnM_KB57 | 100 |
| Lysis     | Phage rIIB lysis inhibitor | KPP_111   | Klebsiella phage vB_KpnM_KB57 | 100 |
|           | endolysin                  | KPP_11591 | Klebsiella phage vB_KpnM_KB57 | 100 |
|           | Cell wall hydrolase        | KPP_12711 | Proteus phage Mydo            | 100 |
|           |                            |           |                               |     |
| Other     | Phage protein              | KPP_1541  | Klebsiella phage vB_KpnM_KB57 | 100 |
|           | Phage protein              | KPP_1611  | Klebsiella phage vB_KpnM_KB57 | 100 |
