# Supplementary material for: Genome Characterization of Bacteriophage KPP-1, a Novel Member in the Subfamily Vequintavirinae, and Use of Its Endolysin for the Lysis of Multidrug-Resistant Klebsiella variicola In Vitro
Source: Microorganisms. 2023 Jan 13;11(1):207. doi: 10.3390/microorganisms11010207 (PMC9862379; doi:10.3390/microorganisms11010207)
Supplement: Supplementary file 1 [file microorganisms-11-00207-s001.zip]

Archive with 5 entries (5 files):
- Annex 1.txt
- Annex 2.pdf
- Supplementary Figures S1-S3.pdf
- Supplementary Table S1.pdf
- Supplementary Table S2.pdf
