# Supplementary material for: Genome Characterization of Bacteriophage KPP-1, a Novel Member in the Subfamily Vequintavirinae, and Use of Its Endolysin for the Lysis of Multidrug-Resistant Klebsiella variicola In Vitro
Source: Microorganisms. 2023 Jan 13;11(1):207. doi: 10.3390/microorganisms11010207 (PMC9862379; doi:10.3390/microorganisms11010207)
Supplement: Supplementary file 1 [file microorganisms-11-00207-s001.zip › Annex 1.txt]

Accession numbers of bacteriophages used in the CLANS analysis. 
0   NC_022920.1_Stap.phage_S25-3
1   NC_022918.1_Staph phage S25-4
2   NC_024788.1Bacillus phage Riley
3   KP339049.1Enterococcus phage EFDG1
4   LN681537.1Clostridium phage phiCD211
5   KJ010548.1Bacillus phage Bp8p-T
6   KJ010547.1Bacillus phage Bp8p-C
7   KM236246.1Bacillus phage Moonbeam
8   KM236245.1Bacillus phage Mater
9   NC_025440.1Listeria phage WIL-1
10  NC_025423.1Bacillus phage CP-51
11  NC_025417.1Staphylococcus phage Team1
12  NC_025416.1Staphylococcus phage MCE-2014
13  KJ094031.2Listeria phage LP-124
14  NC_025426.1Staphylococcus phage P108
15  NC_024216.1Bacillus phage CAM003
16  NC_024213.1Bacillus phage Hakuna
17  NC_024211.1Bacillus phage Megatron
18  NC_024207.1Bacillus phage Evoli
19  NC_024205.1Bacillus phage Hoody T
20  KJ801817.1Enterococcus phage ECP3
21  NC_023501.1Bacillus phage BPS10C
22  gC_024792.1Bacillus phage Bobb
23  NC_024787.1Listeria phage LMTA-148
24  NC_021781.2Listeria phage LP-125
25  NC_024383.1Listeria phage LP-083-2
26  NC_024359.1Listeria phage LP-048
27  KJ094029.1Listeria phage LP-064
28  KC595513.2Bacillus phage Shanette
29  KC595512.2Bacillus phage JL
30  NC_022769.1Bacillus phage BigBertha
31  NC_022763.1Bacillus phage Spock
32  NC_022761.1Bacillus phage CampHawk
33  NC_024364.1Listeria phage List-36
34  NC_024360.1Listeria phage LMSP-25
35  KJ591605.1Listeria phage LMTA-57
36  KJ586795.1Listeria phage LMTA-94
37  KJ586794.1Listeria phage LMTA-34
38  NC_005880.2Staphylococcus phage K
39  NC_024137.1Bacillus phage Bcp1
40  NC_022088.2Bacillus phage Troll
41  JX080304.2Staphylococcus phage MSA6
42  X080305.2Staphylococcus phage P4W
43  JX080303.2Staphylococcus phage Fi200W
44  JX080302.2Staphylococcus phage 676Z
45  JX080301.2Staphylococcus phage A3R
46  JX080300.2taphylococcus phage Staph1N
47  EU418428.2Staphylococcus phage A5W
48  NC_023573.1| Staphylococcus phage phiSA012
49  NC_020081.2acillus phage phiAGATE
50  NC_023009.1Staphylococcus phage Sb-1
51  NC_018863.1Bacillus phage B4
52  NC_022090.1Staphylococcus phage vB_SauM_Remus
53  NC_020877.1Staphylococcus phage vB_SauM_Romulus
54  NC_020873.1Bacillus cereus bacteriophage vB_BceM_Bc431v3
55  NC_020871.1Listeria phage vB_LmoM_AG20
56  NC_009811.2Listeria phage A511
57  NC_018856.1Bacillus phage Bastille
58  NC_016563.1Bacillus phage W.Ph.
59  NC_019726.1Staphylococcus phage JD007
60  JX875065.1Staphylococcus phage SA5
61  NC_019487.1Bacillus phage SP10
62  NC_019448.1Staphylococcus phage GH15
63  NC_018860.1Bacillus phage BCP78
64  NC_018857.1Bacillus phage BPS13
65  JN797798.1Bacillus phage BCU4
66  JN797796.1Bacillus phage B5S
67  NC_011421.1Bacillus phage SPO1
68  NC_012530.1Lactobacillus phage Lb338-1
69  NC_007581.1Clostridium phage c-st
70  NC_007066.1Staphylococcus phage G1
71  NC_007021.1Staphylococcus phage Twort
72  FR852584.1Staphylococcus phage ISP
73  GU169904.1Staphylococcus phage SA1
74  DQ004855.1Listeria bacteriophage P100
75  NC_015253.1Brochothrix phage A9
76  NC_027355.1Bacillus phage BCP8-2
77  KR049063.1Enterococcus phage EFLK1
78  KP687431.1Staphylococcus phage IME-SA1
79  KP687432.1Staphylococcus phage IME-SA2
80  NC_027352.1Bacillus phage JBP901
81  NC_006565.1Lactobacillus phage LP65
82  NC_009904.1Enterococcus phage phiEF24C
83  NC_021856.1Bacillus phage phiNIT1 DNA
84  MT438396.1_KPP-1
85  NC_048807.1_Erwinia_phage_pEp_SNUABM_01
86  NC_011041.1_Escherichia_coli_bacteriophage_rv5
87  NC_022323.1Escherichia phage 2_JES-2013
88  NC_022968.1Escherichia phage 4MG
89  NC_041869.1Escherichia phage APCEc02
90  NC_025830.1 Escherichia phage Av-05
91  NC_041871.1 Escherichia phage Murica
92  NC_028248.1Escherichia phage slur16
93  NC_041937.1Escherichia phage V18
94  NC_024134.1Escherichia phage vB_EcoM_FFH2
95  NC_048647.1Klebsiella phage_KNP2
96  NC_048656.1 Klebsiella phage vB_KpnM_BIS47
97  NC_048873.1 Klebsiella virus_KpS8
98  NC_020201.1 Pectobacterium phage_phiTE
99  NC_048741.1Proteus phage Mydo
100 NC_048682.1Raoultella phage Ro1
101 NC_016071.1Salmonella phage PVP-SE1
102 NC_027351.1Salmonella phage SSE-121
103 NC_017974.1Cronobacter phage CR3
104 NC_024354.1Cronobacter phage CR8
105 NC_023717.1Cronobacter phage CR9
106 NC_028672.1Cronobacter phage PBES_02
107 NC_019400.1Cronobacter phage vB_CsaM_GAP31
108 NC_019517.1Enterobacteria phage vB_EcoM-FV3
109 NC_048828.1Erwinia phage Hena1
110 NC_019526.1Enterobacteria phage vB_KleM-RaK2
111 NC_047932.1Klebsiella virus vB_KpnM_KpS110
112 NC_054653.1Klebsiella virus KpV2811
113 NC_041981.1Klebsiella phage Miro
114 NC_042138.1Klebsiella phage PMBT1
115 NC_049472.1Klebsiella virus UPM 2146
116 NC_041981.1Klebsiella phage Miro
117 NC_048043.1Klebsiella phage NJS2
118 NC_048694.1Klebsiella phage vB_Kpn_F48
119 NC_048798.1Klebsiella phage Marfa
120 NC_061421.1Klebsiella phage vB_KpM_FBKp24
121 NC_061418.1Klebsiella phage KpLz-2_45
122 NC_031087.1Klebsiella phage vB_KpnM_KpV477
123 NC_047994.1Klebsiella phage ZCKP1
124 MT708547.1Klebsiella phage Muenster
125 NC_028750.1Klebsiella phage Matisse
126 NC_020080.1Klebsiella phage KP27
127 NC_055715.1Klebsiella phage KPV15
128 NC_028686.1Klebsiella phage JD18
129 NC_055748.1Klebsiella phage Mineola
